# Supplementary material for: Roles of Lactose and Fructose Malabsorption and Dietary Outcomes in Children Presenting with Chronic Abdominal Pain
Source: PubMed Central journal article supplement (PMC6950325; doi:10.3390/nu11123063), 2019-12-16
Supplement: nutrients-11-03063-s001.pdf [file nutrients-11-03063-s001.pdf]

**Supplemental Table S1:** Basic diagnostic findings in children with chronic abdominal pain (numbers indicate n (%)).

|                     | alarm findings | abdominal examination | blood      | urine      | stool      |
|---------------------|----------------|-----------------------|------------|------------|------------|
| abnormal            | 64 (26%)       | 43 (17%)              | 31 (13%)   | 7 (3%)     | 36 (15%)   |
| normal              | 177 (73%)      | 198 (82%)             | 199 (82%)  | 164 (68%)  | 183 (76%)  |
| missing information | 1 (1%)         | 1 (1%)                | 12 (5%)    | 71 (29%)   | 23 (9%)    |
| <b>total</b>        | <b>242</b>     | <b>242</b>            | <b>242</b> | <b>242</b> | <b>242</b> |

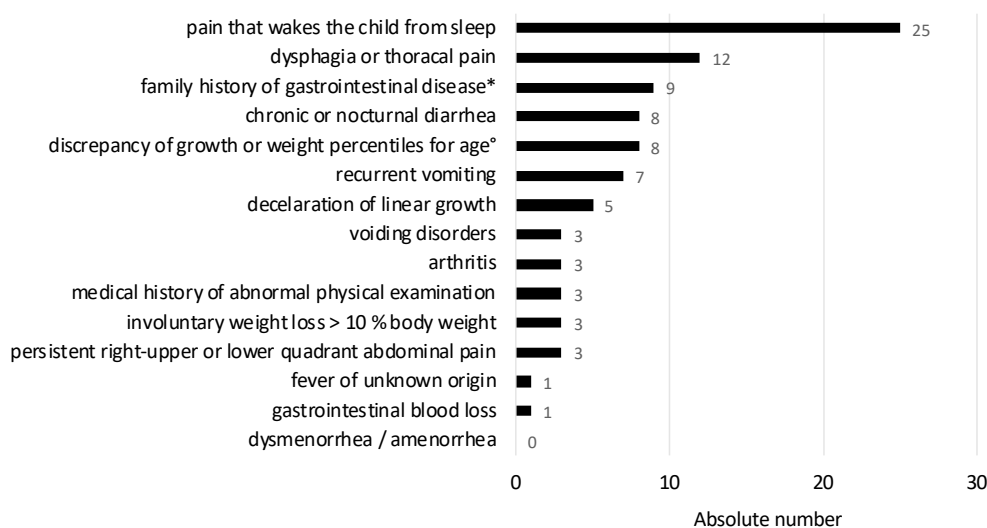

**Supplemental Figure S1:** Alarm findings (n=87) in 64 out of 242 children with chronic abdominal pain. \*e.g. chronic inflammatory disease/ celiac disease/ peptic ulcer or other gastrointestinal diseases. ° according to Kromeyer and Hausschild growth charts. Summing up the number of red flags per patient, at least one red flag was reported resp. observed in n=42 cases, two red flags in n=19; three red flags in n=1, and four red flags in n=2 cases.

**Supplemental Table 2:** Additional diagnostic examinations in 209 children with chronic abdominal pain.

|                   | Abdominal ultrasound | endoscopy | carbohydrate intolerance tests | others  |
|-------------------|----------------------|-----------|--------------------------------|---------|
| examined patients | 128                  | 46        | 135                            | 10      |
| abnormal results  | 12 (9%)              | 12 (46%)  | 55 (41%)                       | 4 (40%) |

Others include MRI, CT, bowel contrast study, sorbitol breath test, fecal helicobacter pylori antigen, prick skin test, and gynecological examination.

**Supplemental Table S3:** Prevalence of abnormal lactose H<sub>2</sub>BT and response to elimination diets in various studies investigating CAP in children.

| authors          | no. of patients | Age (y)<br>mean±SD<br>[range] | dosage         | cut-off | Detection rate<br>% | Dietary response<br>(n) % |
|------------------|-----------------|-------------------------------|----------------|---------|---------------------|---------------------------|
| Ceriani 1988     | 32              | 8.13 ±2.46<br>#               | 2g/kg max.50 g | #       | 75%                 | 58.3%                     |
| Winter 1990      | 62              | #<br>[2-16]                   | 2g/kg max.50 g | Δ≥25ppm | 28.3%               | (16/17 LI) 94.1%          |
| Ockeloen<br>2012 | 91              | 8.4<br>[1.8-17.8]             | 2g/kg          | ≥20ppm  | 41%                 | (17/18 LI) 95.4%          |
| Gijsberg<br>2012 | 210             | 8.8<br>[4.1-16]               | 2g/kg max.50 g | Δ≥30ppm | 27%                 | (24/38)<br>63%            |
| Garg<br>2014     | 62              | #<br>[4-18]                   | 2g/kg max.50 g | Δ≥20ppm | 58%                 | (20/34)<br>58.8%          |

|                   |     |                      |                |         |       |                |
|-------------------|-----|----------------------|----------------|---------|-------|----------------|
| Glatstein<br>2018 | 95  | 10.6 ±3.15<br>[6-18] | 2g/kg max.50 g | Δ≥20ppm | 66.3% | (40/95)<br>38% |
| Present study     | 114 | 9.86 ±1.60<br>[7-12] | 2g/kg max.50 g | Δ≥20ppm | 17.5% | (6/25)<br>24%  |

# = no data available; LI= lactose intolerant; SD = standard deviation; Δ = value measured – baseline value.

**Supplemental Table S4:** Prevalence of abnormal fructose H<sub>2</sub>BT and response to elimination diets in various studies investigating gastrointestinal disease in children.

| authors                 | no. of patients | Age (y)<br>mean±SD<br>[range] | disease        | dosage                    | cut-off  | Detection<br>rate<br>%                                                                  | Dietary<br>response<br>(n) % |
|-------------------------|-----------------|-------------------------------|----------------|---------------------------|----------|-----------------------------------------------------------------------------------------|------------------------------|
| Gomara<br>2008          | 32              | 12.9 <sup>1</sup><br>[7-17]   | CAP            | 1, 15 or 45 g<br>absolute | Δ≥20ppm  | 0/9 (1g) 0%<br>3/10 (15g)<br>30%<br>8/13 (45g)<br>61%<br>55/89<br>62%<br>29/89*<br>33%* | (9/11 FI)<br>81.8%           |
| Tsampalieros<br>2008    | 89              | #<br>[3.7-18.7]               | Not<br>defined | 1g/kg<br>max. 25-50 g     | Δ≥20ppm  | 1-5y 66.6%<br>6-10y 40.4%<br>11-15y<br>27.1%                                            | n.d.                         |
| Jones<br>2011           | 760             | #<br>[0-15]                   | Not<br>defined | 0.5g/kg max.10<br>g       | Δ≥10ppm  | 57/210*<br>27%*                                                                         | (24/38)<br>63%               |
| Gijsberg<br>2012        | 210             | 8.8<br>[4.1-16]               | CAP            | 2g/kg max.50 g            | Δ≥30ppm  | 117/278<br>42%                                                                          | 58.7%                        |
| Wintermeyer<br>2012     | 278             | 8.4<br>[3-14]                 | CAP            | 1g/kg<br>max.25 g         | Δ≥20ppm  | 121/222<br>55%                                                                          | (93/112) 76.9%               |
| Escobar<br>2014         | 222             | 10.5<br>[2-19]                | CAP            | 1g/kg<br>max.25 g         | Δ≥20ppm  | 55/103<br>53%                                                                           |                              |
| Wirth<br>2014           | 103             | Median<br>8.8<br>[3.4-16.4]   | CAP            | 1g/kg<br>max.25 g         | Δ≥20ppm  | 33/103*<br>32%*                                                                         |                              |
| Hammer<br>2018          | 82              | 10.7 ±3.5<br>[5-17.6]         | Not<br>defined | 1g/kg<br>max.25 g         | -        | 33/82<br>40%                                                                            | (15/33)<br>45%               |
| Martinez-Azcona<br>2019 | 71              | 9.5±2.8                       | CAP            | 1g/kg<br>max.25 g         | Δ≥20ppm  | 29/71<br>40.8%                                                                          | 21/29<br>73.4%               |
| Present study           | 118             | 9.81±1.58<br>[7-12]           | CAP            | 1g/kg max.25 g            | Δ ≥20ppm | 35/118*<br>30%*                                                                         | (7/38)<br>18%                |

# = no data available; \* abnormal hydrogen breath test with symptoms; CAP = chronic abdominal pain; FI = fructose intolerance; Δ = value measured – baseline value; <sup>1</sup>) mean weight 55.2 kg.
